# Supplementary material
Source: PubMed Central journal article supplement (PMC3265852)
Supplement: supp_M111.288316_jbc.M111.288316-1.pdf [file supp_M111.288316_jbc.M111.288316-1.pdf]

## Structural and mechanistic insights into an unusual thiol disulfide oxidoreductase

Edwige B. Garcin, Olivier Bornet, Latifa Elantak, Nicolas Vita, Laetitia Pieulle, Françoise Guerlesquin and Corinne Sebban-Kreuzer

### Table of contents

|                                                                                                                                 |     |
|---------------------------------------------------------------------------------------------------------------------------------|-----|
| Table S1: NMR and refinement statistics for Dtrx structures.....                                                                | S-2 |
| Figure S1: Scrambled RNaseA (ScRNase) refolding assay: the cleavage of RNA by RNaseA was followed by 1D <sup>1</sup> H-NMR..... | S-3 |
| Figure S2: Titration of the redox potential of the disulfide bond of Dtrx.....                                                  | S-4 |
| Figure S3: pKa of ionisable residues of reduced and oxidized Dtrx.....                                                          | S-5 |
| Figure S4: Superimposition of <sup>1</sup> H, <sup>15</sup> N-HSQC spectra of Dtrx and DtrxH33G.....                            | S-6 |
| Figure S5: Solution structures of the reduced and oxidized forms of Dtrx.....                                                   | S-7 |
| Figure S6: Structural comparisons. ....                                                                                         | S-8 |

**Table S1: NMR and refinement statistics for Dtrx structures.** Structural statistics and restraint violations of the 20 selected structures representative of Dtrx in solution at pH 5.7 and 290K.

|                                              | Reduced         | Oxidized        |
|----------------------------------------------|-----------------|-----------------|
| <b>NMR distance and dihedral constraints</b> |                 |                 |
| Distance constraints                         |                 |                 |
| Effective distance restraints                | 1846            | 2108            |
| Short range ( $ i-j  \leq 1$ )               | 1152            | 1261            |
| Medium range ( $1 <  i-j  < 5$ )             | 276             | 415             |
| Long range ( $ i-j  \geq 5$ )                | 418             | 432             |
| Average number of restraints per residue     | 17              | 19              |
| H-bond restraints                            | 48              | 70              |
| Dihedral angle restraints from TALOS         | 156             | 156             |
| <b>Structures statistics</b>                 |                 |                 |
| Restraint violations                         |                 |                 |
| Distance $>0,5\text{\AA}$                    | 0               | 1               |
| Dihedral $>5^\circ$                          | 0               | 5               |
| Energies (kcal/mol)                          |                 |                 |
| $E_{\text{total}}$                           | -2951           | -2853           |
| $E_{\text{bond}}$                            | 58              | 57              |
| $E_{\text{angle}}$                           | 338             | 349             |
| $E_{\text{dihedral}}$                        | 975             | 992             |
| $E_{\text{vdw}}$                             | -850            | -866            |
| $E_{\text{electric}}$                        | -7713           | -7090           |
| Average ensemble RMSD ( $\text{\AA}$ )       |                 |                 |
| Backbone                                     | 0.94 $\pm$ 0.15 | 0.59 $\pm$ 0.11 |
| Heavy atoms                                  | 1.31 $\pm$ 0.14 | 0.94 $\pm$ 0.11 |
| Deviations from idealized geometry           |                 |                 |
| bonds ( $\text{\AA}$ )                       | 0.0097          | 0.0100          |
| angles ( $^\circ$ )                          | 2.465           | 2.441           |
| Ramachandran plot (%)*                       |                 |                 |
| Most favorable region                        | 86.5            | 83.4            |
| Additionally allowed region                  | 13.2            | 16.3            |
| Generously allowed region                    | 0.2             | 0.3             |
| Disallowed region                            | 0.0             | 0.0             |

\* calculated using PROCHECK v. 3.5.4

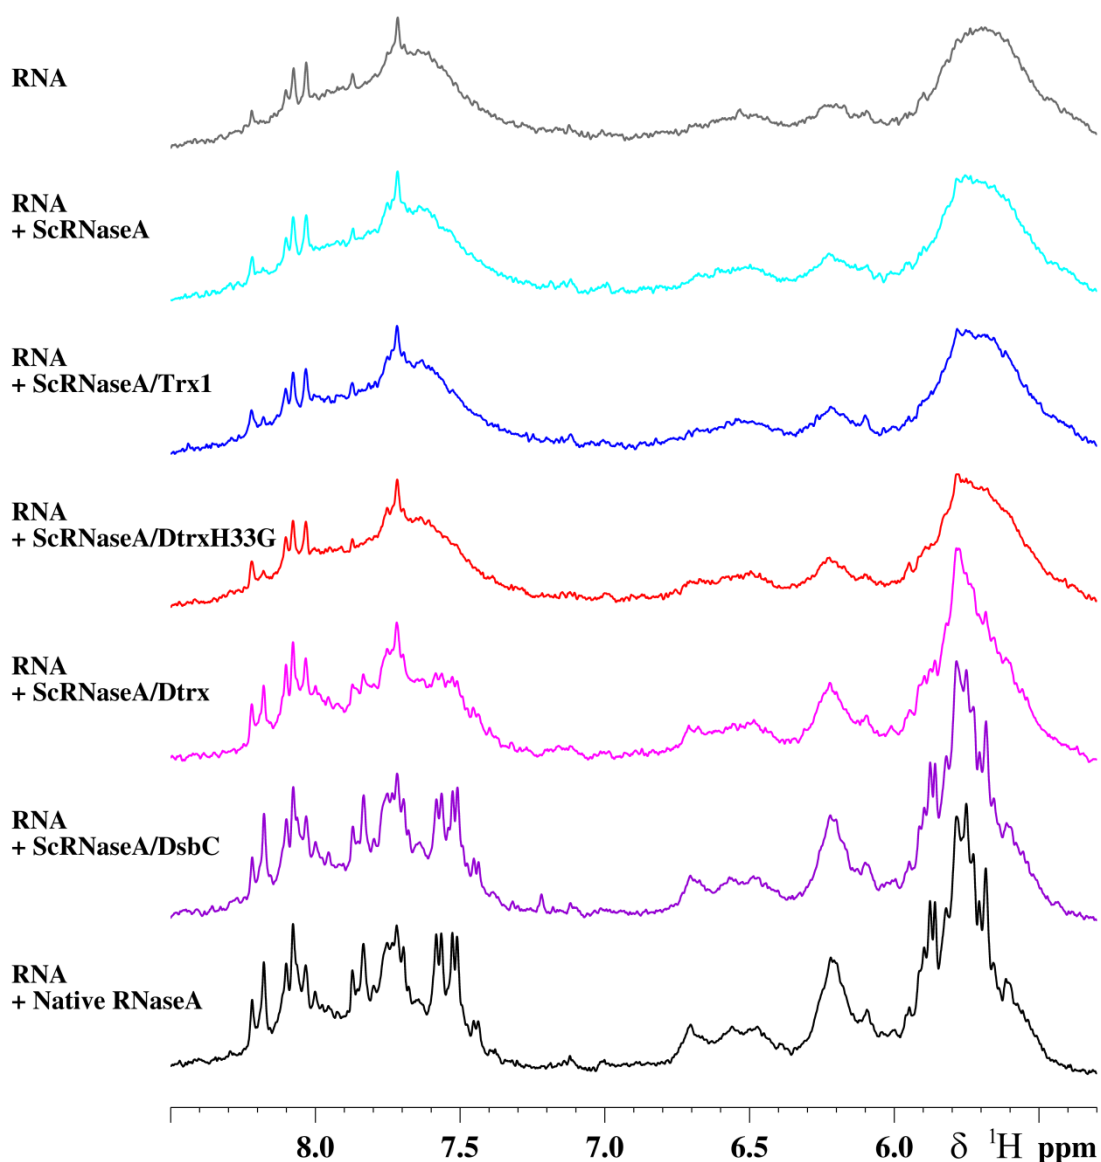

**Figure S1: Scrambled RNaseA (ScRNase) refolding assay: the cleavage of RNA by RNaseA was followed by 1D <sup>1</sup>H-NMR.**

1D <sup>1</sup>H-NMR spectra of RNA with different mixture proteins: ScRNaseA (cyan), Trx1 and ScRNaseA (blue), DtrxH33G and ScRNaseA (red), Dtrx and ScRNaseA (pink), DsbC and ScRNaseA (purple), Native RNaseA (black). The assay was performed at 298K on a Bruker Avance III DRX 500 MHz spectrometer after 30 min of reaction. The NMR sample of RNA was 2 mg/ml in phosphate buffer 100 mM at pH 7 and 10 % D<sub>2</sub>O. For the determination of the percentage of the RNaseA activity of native RNaseA and reshuffling of ScRNaseA after incubation with proteins, the mean intensity of several isolated peaks in RNA spectrum was used relative to RNA spectrum in the presence of native RNaseA. RNA spectrum (grey) in presence of scrambled RNaseA is used as blank.

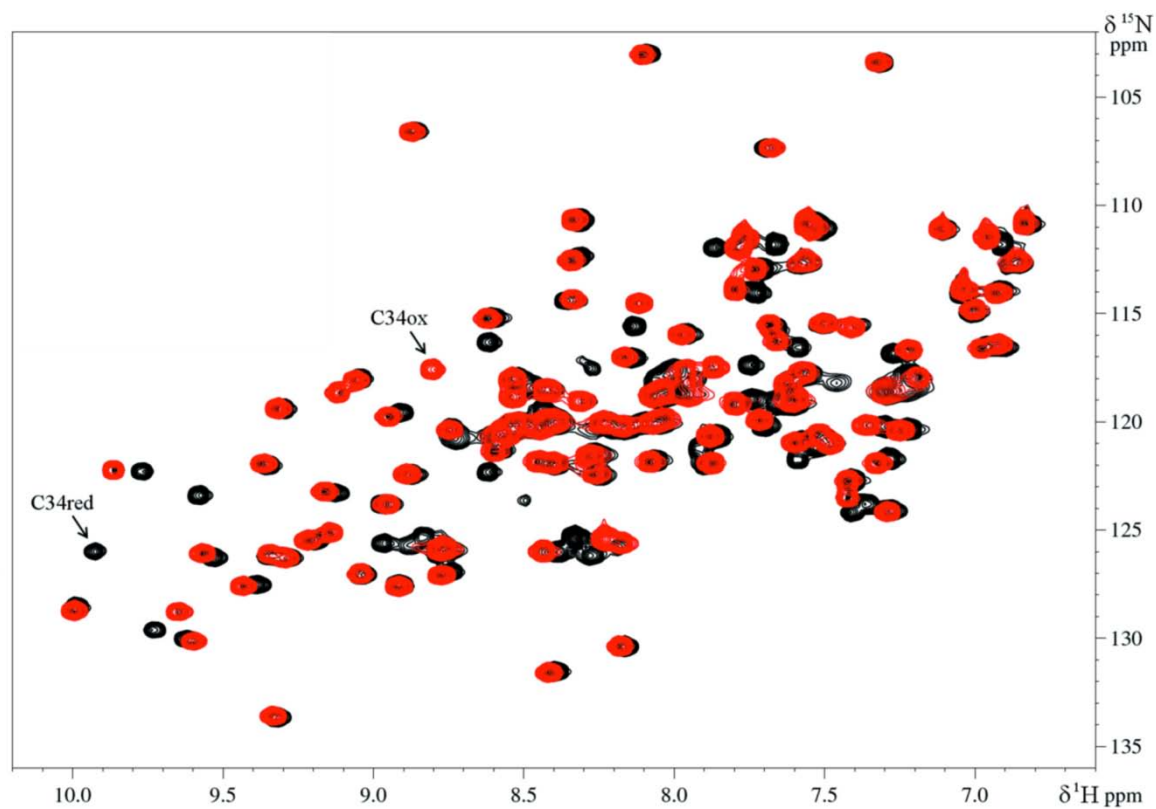

**Figure S2: Titration of the redox potential of the disulfide bond of Dtrx.** Superimposition of the  $^1\text{H}$ - $^{15}\text{N}$  HSQC spectra of Dtrx in the reduced (black) and oxidized (red) states at 298 K and pH 7. Arrows show the NH resonances of C34 under oxidizing (1.1 mM GSSG/1.8 mM GSH) and reducing (5.2 mM GSSG/23.6 mM GSH) conditions.

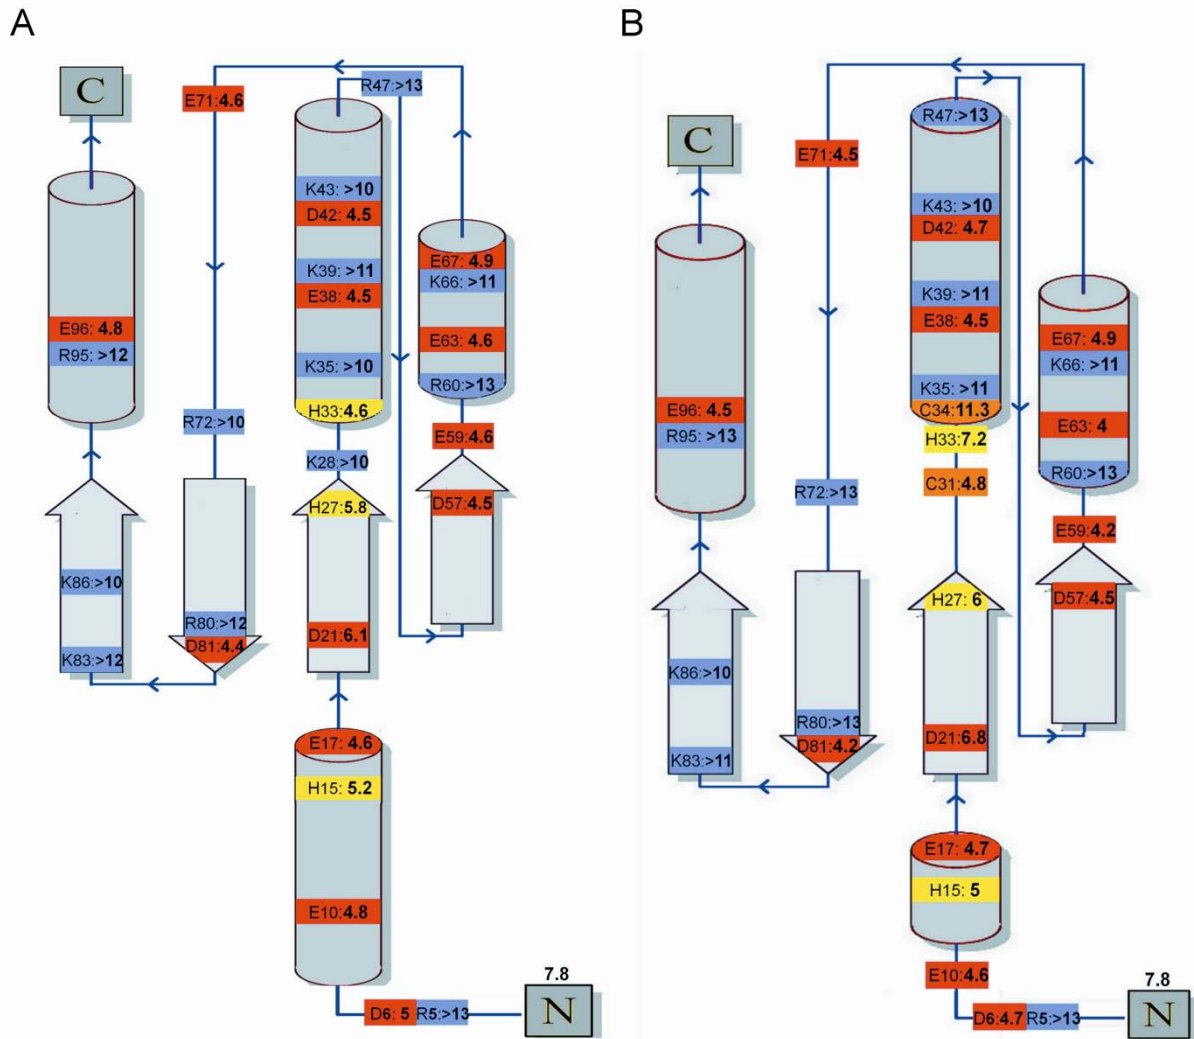

**Figure S3: pKa of ionisable residues of reduced and oxidized Dtrx.** Topology of the oxidized (A) and reduced (B) Dtrx forms.  $\beta$ -strands are shown as arrows and  $\alpha$ -helices as cylinders. The pKas of ionisable residues determined by NMR are indicated. Acid residues Asp, Glu, are boxed in red, basic residues, Arg, Lys, are in blue, histidines are in yellow and cysteines are in orange.

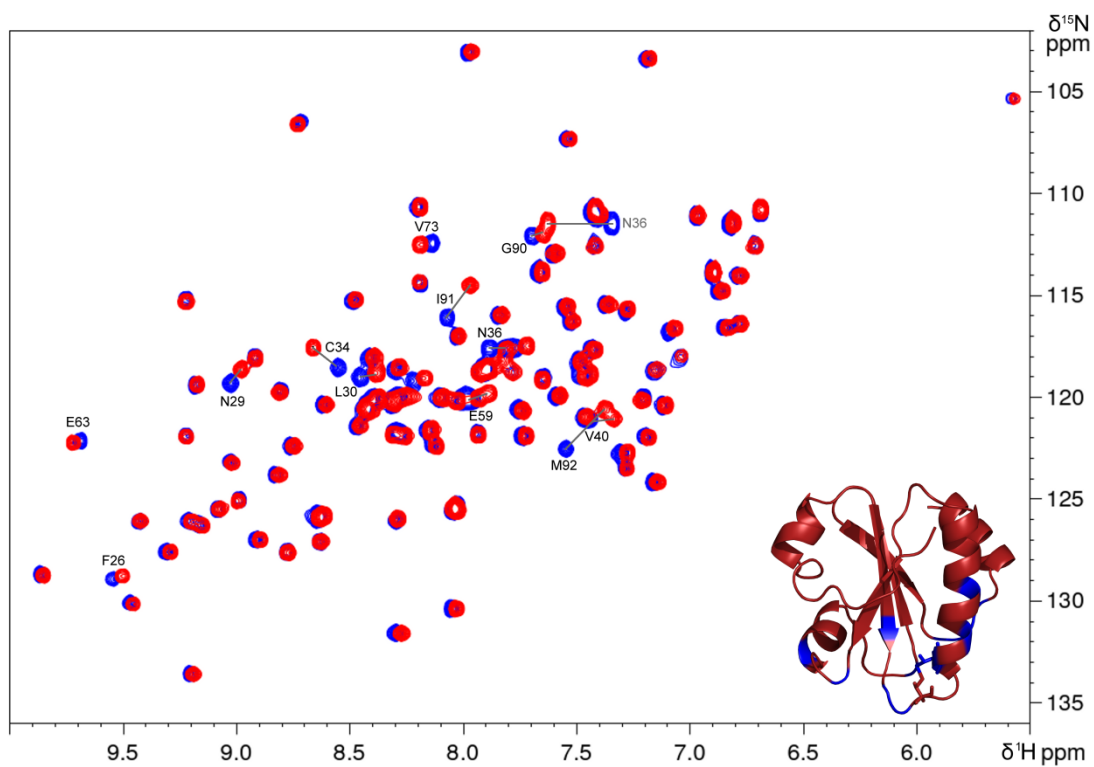

**Figure S4: Superimposition of  $^1\text{H}$ ,  $^{15}\text{N}$ -HSQC spectra of Dtrx and DtrxH33G.** The samples were prepared in 100 mM potassium phosphate buffer pH 7, 50 mM NaCl. The spectra were recorded at 298 K on a 600 MHz NMR spectrometer. Residues undergoing chemical shift changes are labeled in the spectra and reported in blue on the Dtrx structure.

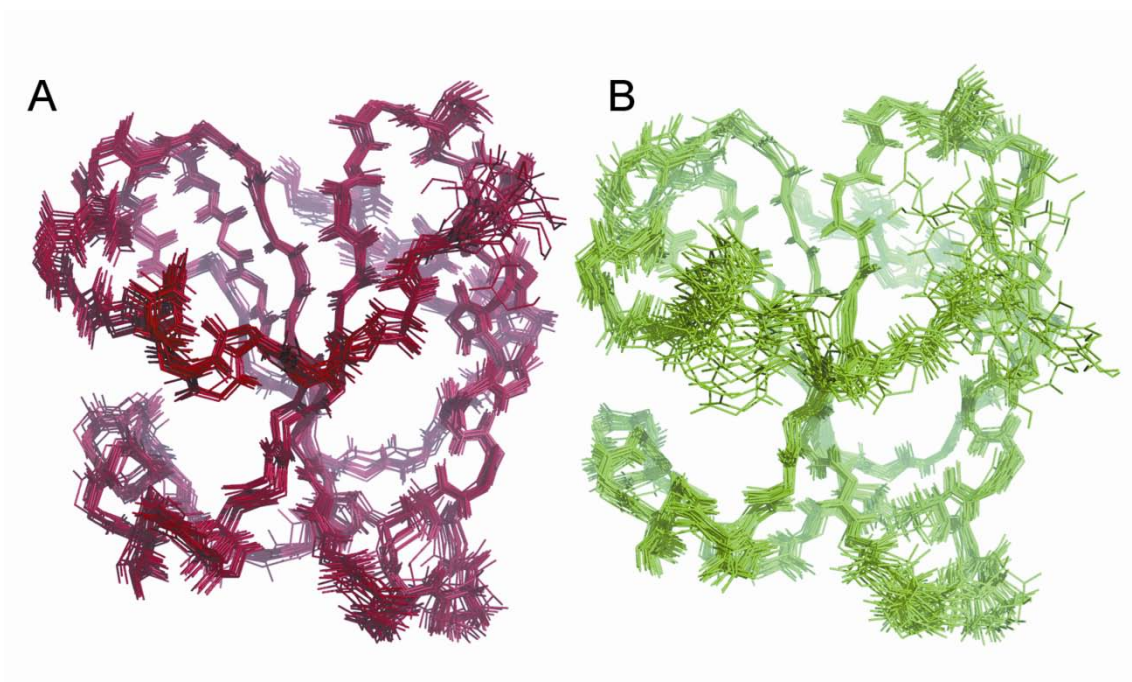

**Figure S5: Solution structures of the reduced and oxidized forms of Dtrx.** Superimposition of 20 representative structures of Dtrx in the oxidized (A) and reduced (B) states. The structures superimposed for minimal rmsd of all protein backbone atoms N, C $\alpha$  and CO.

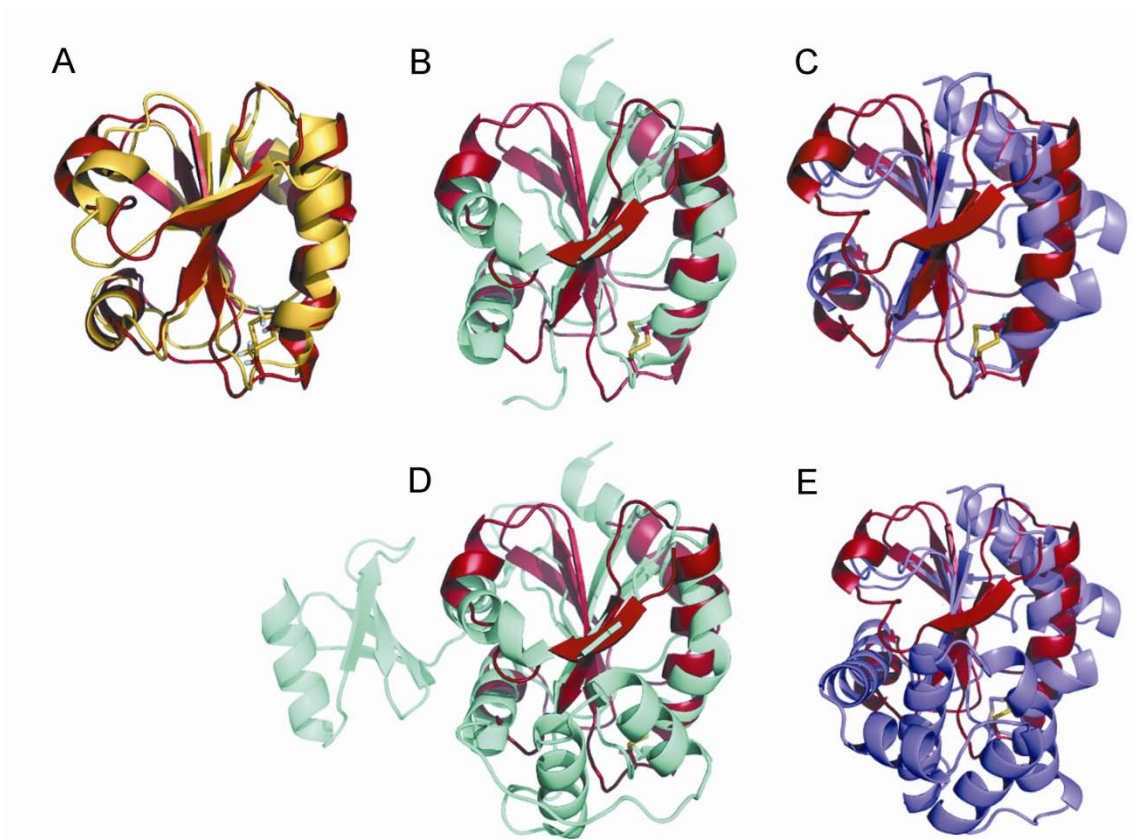

**Figure S6: Structural comparisons.** Overlay of the oxidized structures of Dtrx (red) with (A) *E. coli* Trx (yellow) (PDB entry 1XOA), (B) *E. coli* DsbA thioredoxin domain without the inserted helical domain F62-Q136 (blue) (PDB entry 1A2J), (C) *E. coli* DsbC thioredoxin domain without the inserted helical domain L126-V163 (purple) (PDB entry 1EEJ), (D) *E. coli* DsbA (blue), (E) *E. coli* DsbC (purple). The catalytic disulfide bond is shown as yellow sticks.
